# Supplementary material for: Post-phacoemulsification iris changes in eyes with glaucoma or glaucoma suspect status
Source: PLoS One. 2018 Dec 13;13(12):e0208776. doi: 10.1371/journal.pone.0208776 (PMC6292659; doi:10.1371/journal.pone.0208776)
Supplement: S1 Data — (XLSX) [file pone.0208776.s001.xlsx]

## Sheet: Master Phaco Data, MF
ID#	eye (OD=0, OS=1)	Exclude (0=no, 1=yes)	dx	Sunee Dx	CCT preop	C:D preop	preopAOD250	preopIT750	preopIT2000	preopITCM	preopIAREA	preopICURV:	preopTILT	preopPCCURV(mm)	preopACCURV(mm)	preopCTHICK	preopCLENGTH(mm)	preopPUPILD(mm)	preopSSpurx	preopSSpury	preopAutoRecx	preopAutoRecy	preopRelativeError	POM3IT750	POM3IT2000	POM3ITCM	POM3IAREA	POM3ICURV:	POM3TILT	POM3PCCURV(mm)	POM3ACCURV(mm)	POM3CTHICK	POM3CLENGTH(mm)	POM3PUPILD(mm)	POM3SSpurx	POM3SSpury	POM3AutoRecx	POM3AutoRecy	POM3RelativeError
1	0	0	Other	MMG	513	0.8	0.161	0.40	0.59	0.67	2.25	0.45	0.006	6.85	7.73	543.40	13.91	4.53	497	153	512	167	4	0.40	0.45	0.59	1.38	0.15	-0.070	8.27	9.04	538.70	13.48	4.51	531	171	540	182	811
1	1	0		MMG	523	0.65	0.322	0.40	0.51	0.69	1.38	0.25	0.091	6.05	6.75	548.30	13.31	4.83	97	177	93	181	23	0.40	0.45	0.56	1.40	0.12	-0.013	6.96	7.71	532.60	13.34	4.40	103	170	96	178	809
2	0	0	POAG	POAG	503	0.8	0.234	0.48	0.51	0.61	1.61	0.24	0.092	6.77	7.49	527.50	13.46	4.24	522	192	528	201	5	0.56	0.48	0.61	0.61	0.09	0.000	6.21	6.75	509.00	14.13	3.68	540	144	543	153	23
4	0	0	POAG	POAG	551	0.4	0.080	0.51	0.48	0.56	1.58	0.24	0.073	6.32	7.09	566.60	12.65	3.33	493	178	495	180	4	0.48	0.45	0.59	1.69	0.05	-0.058	6.43	7.01	576.60	12.94	3.28	501	191	507	197	239
5	1	0		MMG		0.35	0.130	0.43	0.51	0.59	1.18	0.13	0.125	6.29	7.28	551.70	11.78	3.76	99	170	93	176	6	0.43	0.48	0.53	1.42	0.19	-0.066	6.27	7.76	504.60	11.91	2.99	108	147	95	164	17
6	0	0		Suspect		0.4	0.283	0.77	0.69	0.99	2.68	0.56	0.115	6.72	7.57	608.10	13.22	3.61	518	202	518	206	2969	0.51	0.59	0.69	0.89	0.41	0.024	5.73	6.24	563.70	13.71	3.12	489	162	492	174	26
7	0	0	PACG	POAG	567	0.5	0.237	0.40	0.48	0.64	1.65	0.10	0.251	6.75	7.79	533.00	13.08	3.49	521	146	531	160	4	0.45	0.53	0.67	1.54	0.11	0.022	7.25	8.29	583.80	13.20	4.11	505	134	518	153	1399
9	0	0	POAG	POAG	582	0.5	0.190	0.32	0.40	0.53	1.48	0.42	0.165	6.64	7.09	711.60	12.73	3.41	523	215	533	223	35	0.32	0.45	0.51	0.64	0.27	0.023	4.93	5.49	584.20	13.32	2.64	523	184	527	194	26
10	0	0	NTG	NTG	541	0.75	0.212	0.37	0.45	0.53	1.44	0.24	0.040	6.61	7.39	565.80	13.48	4.43	508	164	503	164	5	0.40	0.43	0.53	0.31	0.26	-0.017	5.52	6.13	559.40	13.52	2.91	514	162	516	167	26
10	1	0	NTG	NTG	536	0.65	0.350	0.45	0.53	0.59	1.38	0.14	0.038	6.93	7.68	549.50	13.20	4.61	96	182	85	196	6	0.29	0.43	0.61	1.59	0.07	-0.060	6.56	6.80	536.10	13.72	3.15	73	171	65	178	647
12	0	0	Suspect	PACS	631	0.5	0.043	0.51	0.59	0.72	2.57	0.62	0.030	4.96	5.41	645.20	12.51	4.12	509	164	504	162	71	0.56	0.53	0.64	1.92	0.27	0.016	6.53	7.39	646.30	12.80	3.04	506	158	514	173	2714
12	1	0	Suspect	PACS	632		0.130	0.48	0.56	0.72	1.71	0.01	0.201	6.21	7.09	653.30	12.81	4.00	70	214	62	223	20	0.45	0.51	0.69	1.82	0.10	-0.012	6.08	6.64	626.10	12.72	3.01	131	176	118	191	4319
16	1	0	NTG	suspect	548	0.6	0.188	0.56	0.72	0.75	1.76	0.16	0.203	6.64	7.55	571.20	12.67	4.13	148	188	140	201	5	0.56	0.59	0.72	1.77	0.04	-0.045	6.43	7.39	553.10	13.03	3.79	97	165	93	168	774
17	0	0	PACG	MMG	519	0.8	0.080	0.67	0.45	0.72	2.24	0.80	0.074	6.21	6.99	541.20	12.97	2.53	500	191	503	197	6	0.67	0.48	0.72	0.55	0.06	0.010	6.21	6.83	506.80	13.19	3.95	530	156	531	160	23
23	0	0	POAG	POAG	557	0.8	0.258	0.53	0.45	0.64	1.57	0.37	0.143	6.91	7.95	557.60	12.77	4.32	514	158	520	169	6	0.51	0.53	0.67	1.79	0.24	0.012	8.11	9.31	556.70	13.40	3.76	522	161	530	173	463
23	1	0	POAG	POAG	558	0.8	0.346	0.56	0.56	0.72	1.81	0.18	0.182	6.96	7.87	570.60	13.56	4.40	131	133	118	149	6	0.56	0.56	0.72	1.81	0.18	0.182	6.96	7.87	570.60	13.56	4.40	93	166	118	149	6
24	0	0	Suspect	PACS	546	0.5	0.172	0.51	0.45	0.56	1.47	0.06	0.278	6.21	7.25	552.20	12.57	4.80	498	190	495	195	6	0.56	0.43	0.56	1.46	0.11	-0.032	7.63	8.75	546.90	12.47	3.63	526	155	530	166	503
26	0	0	Suspect	Suspect	524	0.7	0.338	0.53	0.51	0.61	1.73	0.32	0.193	6.32	7.31	550.80	13.37	4.67	503	203	501	208	5	0.53	0.48	0.56	1.55	0.08	0.025	6.88	7.84	534.60	13.44	4.19	519	174	519	179	244
26	1	0	Suspect	Suspect	531	0.7	0.440	0.40	0.48	0.64	1.48	0.16	0.146	6.27	7.23	525.00	13.26	4.83	93	189	88	198	6	0.48	0.48	0.59	1.62	0.13	0.016	6.91	7.79	555.20	13.34	3.63	110	149	98	161	971
29	0	0	Other	PACS	542	0.75	0.105	0.51	0.51	0.64	1.59	0.18	0.251	6.45	7.25	565.40	13.44	3.49	509	192	510	197	5	0.67	0.51	0.72	1.92	0.30	-0.005	6.75	7.81	545.30	13.37	3.60	509	148	514	157	5
31	1	0	Other	MMG	562	0.7	0.041	0.48	0.53	0.69	1.48	0.26	0.170	6.40	7.28	586.60	12.77	4.27	90	177	103	167	2	0.48	0.53	0.69	1.10	0.11	-0.084	4.75	5.15	560.70	12.74	3.76	82	165	76	173	20
33	1	0	Other	PACS	540	0.65	0.189	0.37	0.69	0.75	1.56	0.34	0.158	5.89	6.77	563.50	12.22	4.75	104	165	96	173	4	0.40	0.51	0.64	1.34	0.22	0.079	5.79	6.48	555.80	12.55	5.09	100	211	95	221	827
36	1	0	POAG	POAG	557	0.6	0.235	0.56	0.45	0.59	1.60	0.42	0.235	6.75	7.49	554.40	13.76	4.99	49	156	36	178	5	0.48	0.35	0.56	0.89	0.20	-0.015	4.96	5.36	576.60	13.90	3.15	70	156	66	174	23
37	0	0		Suspect	596	0.3	0.366	0.35	0.45	0.67	1.35	0.28	0.118	6.77	7.55	608.30	13.52	5.04	508	172	513	182	17	0.37	0.40	0.59	0.28	0.22	-0.042	6.16	6.69	629.20	13.45	4.13	527	156	540	178	62
37	1	0		Suspect	589	0.2	0.451	0.32	0.43	0.61	1.30	0.18	0.157	6.75	7.36	597.80	13.78	4.48	78	158	65	181	20	0.27	0.40	0.59	1.38	0.15	0.014	6.08	6.75	601.10	14.15	3.87	98	161	94	169	2897
42	0	0	POAG	Suspect	575	0.5	0.131	0.45	0.43	0.48	1.37	0.27	0.169	6.35	7.39	569.50	12.46	4.08	488	188	487	190	6	0.37	0.43	0.51	1.41	0.17	-0.023	6.83	8.05	547.30	12.75	3.71	510	150	510	152	1287
42	1	0	POAG	POAG	558	0.6	0.198	0.40	0.45	0.61	1.40	0.14	0.110	6.83	7.76	562.90	12.72	3.76	130	196	544	243	6	0.37	0.40	0.56	1.28	0.14	-0.045	7.33	8.61	564.60	12.67	3.87	105	176	517	143	749
43	0	0	POAG	POAG	521	0.7	0.222	0.45	0.43	0.45	1.39	0.17	0.211	6.61	7.55	538.20	14.31	4.77	527	183	540	198	4	0.40	0.37	0.51	1.41	0.09	-0.028	7.31	8.08	556.90	14.46	4.21	547	161	553	172	854
43	1	0	POAG	POAG	522	0.4	0.274	0.29	0.40	0.51	1.38	0.19	0.127	6.91	7.84	543.10	14.28	4.56	69	174	56	192	5	0.37	0.45	0.53	0.26	0.08	-0.048	5.31	5.73	576.10	14.35	4.43	72	186	64	196	20
46	0	0	POAG	POAG	573	0.5	0.206	0.56	0.59	0.67	1.74	0.04	0.011	6.51	7.79	556.70	12.68	4.48	523	182	531	189	6	0.48	0.56	0.61	1.73	0.14	0.014	6.53	8.13	560.30	12.99	4.27	507	157	507	161	2645
47	0	0	Suspect	PACS	536	0.7	0.133	0.53	0.56	0.64	1.41	0.19	0.333	6.37	7.20	543.90	13.06	5.41	544	164	539	165	6	0.56	0.45	0.61	1.46	0.22	0.002	7.52	8.53	561.30	13.19	4.96	501	166	514	178	195
47	1	0	Suspect	PACS	539	0.6	0.129	0.48	0.53	0.56	1.22	0.12	0.302	6.29	7.23	538.10	13.29	5.55	60	168	61	176	6	0.37	0.56	0.59	1.45	0.18	-0.029	6.32	7.20	543.50	13.42	5.25	86	165	73	180	1210
48	1	0	Suspect	PACS	539	0.2	0.199	0.45	0.45	0.51	1.46	0.08	0.253	6.37	7.31	527.20	13.61	4.27	85	160	81	166	5	0.53	0.48	0.53	1.83	0.33	0.021	6.61	7.36	551.90	13.42	2.88	84	150	78	156	1181
50	1	0	Suspect	Suspect	506	0.7	0.290	0.43	0.48	0.53	1.24	0.17	0.068	6.80	7.36	525.30	13.84	5.28	94	160	88	170	17	0.40	0.45	0.51	1.27	0.15	-0.063	6.80	7.52	518.40	13.70	4.88	77	153	71	164	977
55	0	0	POAG	POAG	459	0.55	0.449	0.29	0.37	0.53	1.40	0.15	0.045	6.69	7.57	461.80	14.26	4.29	549	171	562	189	6	0.37	0.40	0.53	1.39	0.10	-0.012	7.71	8.40	463.60	14.53	4.35	528	158	541	171	2573
56	0	0	Suspect	Suspect	576	0.45	0.319	0.51	0.45	0.61	1.79	0.39	0.180	6.59	7.17	583.80	14.40	3.97	524	183	529	192	20	0.56	0.48	0.67	1.92	0.20	0.020	7.44	8.11	579.20	14.28	3.87	527	163	540	185	527
56	1	0	Suspect	Suspect	579	0.5	0.377	0.51	0.53	0.83	1.99	0.16	0.041	6.27	6.91	566.70	13.83	3.65	58	167	48	180	17	0.40	0.51	0.75	1.96	0.16	-0.046	6.32	6.96	585.50	14.21	3.55	79	160	68	176	599
57	0	0	Suspect	PACs	521	0.6	0.263	0.53	0.27	0.77	2.72	0.80	0.055	4.99	5.28	532.30	14.10	3.97	514	174	512	180	26	0.45	0.27	0.61	0.59	0.25	0.013	5.44	5.95	529.80	14.27	2.80	548	172	547	176	26
59	0	0	POAG	POAG	506	0.8	0.123	0.56	0.43	0.59	1.58	0.20	0.263	6.51	7.17	547.50	13.72	3.60	526	186	521	186	20	0.43	0.40	0.53	1.61	0.11	-0.048	7.73	8.64	513.20	14.04	3.17	531	159	532	163	116
60	1	0	Suspect	Suspect	597	0.6	0.287	0.48	0.51	0.53	1.16	0.19	0.118	5.60	6.13	571.90	13.04	5.44	92	186	79	200	125	0.35	0.51	0.56	1.20	0.05	-0.043	6.16	6.85	599.70	13.29	4.85	71	154	60	165	233
62	0	0		Suspect	509		0.166	0.29	0.48	0.59	0.58	0.28	0.011	5.39	6.19	540.40	12.74	3.04	530	154	533	162	8	0.37	0.40	0.64	1.47	0.21	-0.023	5.84	6.61	524.50	13.28	3.28	539	148	540	156	422
65	1	0	POAG	POAG	548	0.75	0.256	0.51	0.45	0.53	1.43	0.18	0.148	5.17	5.68	560.50	14.08	4.24	84	199	78	208	20	0.43	0.40	0.53	1.58	0.13	0.008	6.08	6.48	573.10	14.12	3.41	81	176	73	189	551
68	0	0	Suspect	Suspect	540	0.7	0.410	0.45	0.51	0.67	1.64	0.25	0.118	7.15	7.76	557.20	13.56	3.52	500	181	513	195	1271	0.45	0.45	0.53	1.36	0.05	0.075	6.69	7.49	541.90	13.81	4.51	504	200	507	208	69
68	1	0	Suspect	Suspect	542	0.7	0.392	0.51	0.51	0.67	1.54	0.26	0.057	5.97	6.64	559.80	13.43	4.53	81	167	73	181	11	0.48	0.45	0.61	1.57	0.15	-0.010	6.11	6.48	537.60	14.11	4.56	74	194	202	514	461
73	1	0	POAG	POAG	540	0.4	0.228	0.45	0.40	0.45	1.30	0.42	0.034	5.73	6.59	536.90	12.73	4.72	71	169	72	174	4	0.53	0.37	0.69	1.52	0.24	0.008	6.16	7.39	569.00	13.13	3.89	88	170	89	174	104
74	0	0	POAG	POAG	493	0.85	0.212	0.43	0.37	0.59	1.55	0.47	0.116	6.29	7.41	460.00	13.06	4.53	491	177	491	181	167	0.40	0.40	0.67	1.49	0.28	-0.075	6.80	7.39	499.90	13.36	4.05	524	177	527	188	41
77	0	0	Suspect	Suspect	579	0.55	0.168	0.37	0.48	0.61	1.81	0.58	0.084	6.48	7.41	573.90	13.35	2.93	549	210	553	218	5	0.40	0.53	0.59	1.90	0.05	0.028	8.29	9.25	587.50	13.56	2.48	543	162	552	174	869
80	1	0	Other	OHT	594	0.4	0.113	0.43	0.48	0.53	1.56	0.35	0.135	6.69	7.52	611.30	13.40	4.73	76	179	75	184	11	0.45	0.48	0.59	1.63	0.11	-0.051	5.63	6.21	598.30	13.92	3.68	83	154	75	168	1763
81	1	0	Suspect	Suspect	528	0.5	0.378	0.29	0.35	0.48	1.05	0.25	0.025	8.16	9.04	519.80	14.98	6.27	43	169	30	184	6	0.19	0.27	0.40	0.78	0.10	-0.008	6.11	6.45	528.70	14.78	5.25	69	147	56	162	35
82	0	0	POAG	Suspect	619	0.7	0.191	0.48	0.45	0.53	1.65	0.36	0.108	7.20	8.27	605.40	13.67	3.84	518	169	518	176	239	0.53	0.48	0.59	1.56	0.02	0.045	6.91	8.21	595.60	14.18	4.45	513	165	526	184	869
83	0	0	Suspect	Suspect	527	0.6	0.217	0.43	0.40	0.56	1.64	0.21	0.010	7.12	8.03	532.90	13.45	3.73	524	183	526	190	5	0.56	0.45	0.56	1.71	0.16	-0.025	7.76	8.69	557.90	13.78	3.79	486	169	497	179	39
85	0	0	Suspect	PACS	520	0.3	0.235	0.59	0.67	0.77	1.68	0.42	0.069	6.59	7.33	525.20	12.69	4.77	514	169	518	177	3	0.51	0.51	0.59	1.49	0.05	0.002	6.48	7.44	529.90	12.88	4.05	473	190	475	198	467
90	1	0	PACG	MMG	524	0.5	0.246	0.43	0.43	0.61	1.47	0.37	0.103	7.04	7.81	552.20	13.32	4.71	90	156	92	157	3	0.35	0.45	0.51	1.38	0.08	-0.012	6.51	7.01	508.50	13.63	4.53	87	159	86	165	209
91	0	0	POAG	POAG	537	0.9	0.155	0.45	0.29	0.51	1.51	0.40	0.036	6.88	7.68	518.10	13.28	4.12	507	153	517	165	5	0.48	0.45	0.48	1.06	0.13	-0.044	7.57	8.35	541.00	13.66	4.99	516	144	520	154	1115
91	1	0	POAG	POAG	540	0.9	0.195	0.43	0.40	0.51	1.77	0.52	0.078	6.48	7.15	555.60	13.71	2.43	78	180	78	182	14	0.43	0.40	0.48	1.40	0.14	-0.019	6.16	6.59	541.40	13.82	3.55	112	169	109	175	1247
92	0	0	Suspect	PACS	470	0.4	0.160	0.59	0.64	0.72	1.91	0.22	0.197	6.67	7.55	460.40	14.07	5.31	548	158	550	163	6	0.69	0.56	0.72	2.16	0.30	-0.029	8.91	9.33	462.80	14.20	4.59	546	166	557	176	1133
92	1	0	Suspect	PACS	479	0.5	0.209	0.64	0.67	0.67	1.83	0.19	0.230	7.04	7.71	487.70	13.96	5.31	78	163	69	171	23	0.72	0.61	0.72	2.20	0.16	0.007	7.55	8.59	467.40	14.03	4.11	55	155	44	169	1028
93	0	0	Suspect	PACS	529	0.5	0.042	1.79	2.24	2.45	5.75	0.10	0.144	6.08	6.93	542.70	12.38	5.34	486	168	478	164	5	0.48	0.53	0.69	0.27	0.20	-0.003	5.47	6.53	517.90	12.51	3.97	483	177	486	181	7
95	0	0	POAG	POAG	528	0.6	0.125	0.35	0.29	0.59	1.15	0.33	0.215	6.48	7.17	558.30	13.27	4.61	525	165	531	174	14	0.35	0.37	0.51	0.03	0.14	-0.008	6.21	7.07	519.50	13.57	4.27	515	184	519	192	6
95	1	0		POAG	541	0.75	0.151	0.32	0.32	0.48	1.09	0.29	0.198	5.63	6.08	578.30	13.05	4.16	60	203	47	215	1910	0.45	0.35	0.45	1.14	0.18	0.020	5.33	5.89	530.60	13.46	4.66	72	137	62	152	566
97	0	0	Suspect	Suspect	521	0.3	0.115	0.59	0.56	0.61	2.19	0.61	0.048	5.60	6.08	568.20	12.45	1.89	505	157	506	160	3584	0.45	0.56	0.59	1.76	0.14	-0.078	7.49	8.32	545.10	12.66	2.99	487	183	492	191	431
99	0	0		Suspect	498	0.3	0.000	0.35	0.45	0.85	0.67	0.43	-0.060	8.21	8.27	598.10	13.06	4.31	480	169	465	151	29	0.53	0.32	0.59	0.07	0.06	-0.042	6.56	7.36	501.80	13.37	4.61	515	150	528	170	6
100	0	0	Suspect	PACS	513	0.45	0.165	0.51	0.45	0.72	2.18	0.84	0.190	6.53	7.41	510.30	13.38	5.08	496	148	503	156	7	0.51	0.45	0.53	1.64	0.25	0.008	6.93	8.00	515.30	13.41	3.95	513	163	522	174	1140
100	1	0	Suspect	PACS	510		0.126	0.37	0.48	0.53	1.33	0.11	0.363	6.51	7.39	515.50	13.65	4.72	99	178	86	195	7	0.32	0.51	0.61	1.34	0.27	-0.023	6.93	7.84	514.40	13.57	4.56	105	173	96	184	1000
101	0	0	Suspect	PACS		0.3	0.070	0.45	0.59	0.77	1.67	0.34	0.200	6.67	7.17	529.20	13.45	5.75	503	169	499	170	17	0.40	0.37	0.59	1.46	0.21	-0.092	7.44	8.13	504.70	13.21	4.59	58	187	60	193	461
102	0	0	Suspect	PACS	529	0.7	0.265	0.48	0.56	0.64	1.77	0.35	0.245	7.04	8.11	534.40	13.56	4.56	543	172	545	179	5	0.56	0.51	0.64	2.08	0.35	0.016	7.52	8.77	548.50	13.55	3.65	536	162	549	187	4
102	1	0	Suspect	PACS	531	0.7	0.224	0.45	0.51	0.61	1.81	0.49	0.302	6.61	7.63	533.70	13.80	4.21	69	169	59	192	5	0.61	0.51	0.67	2.14	0.35	0.107	6.64	7.01	552.40	13.57	3.41	106	180	93	200	335
106	0	0	Suspect	PACS	557	0.4	0.186	0.29	0.48	0.51	1.29	0.45	0.201	6.35	7.25	554.20	12.57	4.27	508	181	511	188	6	0.27	0.48	0.61	1.36	0.20	-0.047	6.91	7.97	566.30	12.78	3.87	530	169	538	178	714
107	0	0	Suspect	Suspect	554	0.7	0.221	0.43	0.45	0.56	1.47	0.55	0.055	5.89	6.88	617.00	12.90	4.44	499	175	508	189	20	0.37	0.48	0.59	1.30	0.10	-0.052	6.40	7.47	572.90	13.29	5.37	513	168	515	180	309
113	0	0	Suspect	Suspect	514	0.5	0.144	0.32	0.37	0.51	1.64	0.61	0.090	6.19	6.91	530.60	13.22	2.86	503	158	503	161	6	0.48	0.37	0.48	1.59	0.27	0.008	6.21	6.61	528.40	13.87	3.57	518	202	519	209	95
113	1	0	Suspect	Suspect	521	0.4	0.154	0.40	0.40	0.59	1.39	0.38	0.149	5.25	5.73	553.10	13.27	3.28	120	169	121	170	29	0.37	0.40	0.48	1.52	0.18	-0.059	5.17	5.68	525.40	13.89	4.72	73	171	73	175	2372
123	0	0	POAG	POAG	529	0.7	0.198	0.48	0.40	0.61	1.46	0.11	0.112	5.97	6.77	531.30	13.36	3.23	512	163	517	172	5	0.37	0.45	0.53	1.54	0.08	-0.096	5.65	6.19	558.20	13.11	3.01	87	166	85	173	1031
123	1	0	POAG	POAG	538	0.7	0.162	0.48	0.45	0.56	1.56	0.24	0.144	6.16	6.91	545.00	13.41	3.65	103	180	186	532	5	0.40	0.45	0.59	1.55	0.07	-0.028	6.29	6.83	561.30	12.82	2.64	112	162	108	170	2213
124	1	0	Suspect	PACS	626	0.3	0.074	0.51	0.61	0.75	1.24	0.02	0.357	6.21	7.28	653.20	13.08	5.63	97	179	96	181	14	0.43	0.43	0.56	0.72	0.15	0.064	5.01	5.55	626.10	13.25	4.19	60	157	47	172	62
128	0	0	Suspect	Suspect	538	0.7	0.387	0.40	0.40	0.59	1.54	0.31	0.061	7.25	8.24	561.40	14.95	4.93	521	178	525	183	6	0.51	0.37	0.56	1.60	0.14	0.010	7.81	8.61	589.90	14.91	4.67	526	179	528	185	342
132	0	0	Suspect	Suspect	630	0.5	0.302	0.56	0.59	0.72	1.43	0.07	0.002	6.53	7.44	613.70	13.02	5.94	492	161	496	170	14	0.43	0.56	0.61	1.49	0.18	-0.145	7.17	8.11	636.10	13.52	4.83	530	168	534	174	482
134	1	0	Suspect	Suspect	622	0.3	0.239	0.43	0.35	0.48	1.25	0.26	0.177	6.16	7.15	638.30	13.69	3.97	87	179	76	198	14	0.35	0.29	0.53	1.35	0.19	-0.029	6.11	6.80	635.80	13.81	3.28	96	183	90	194	2663
137	0	0	Suspect	Suspect	571	0.5	0.266	0.35	0.37	0.56	1.63	0.17	0.130	6.64	7.49	581.10	13.86	2.85	525	150	538	170	4	0.35	0.35	0.61	1.72	0.17	0.019	7.25	8.19	589.40	13.91	2.16	507	180	508	185	209
140	1	0	Suspect	Suspect	553	0.7	0.258	0.35	0.37	0.48	1.34	0.26	0.259	6.93	7.65	551.60	14.22	3.71	97	182	84	195	6	0.75	0.43	0.75	1.10	0.38	0.103	5.41	5.84	549.00	15.11	3.79	62	169	49	184	20
142	0	0	Suspect	Suspect	544	0.5	0.120	0.48	0.45	0.56	1.44	0.29	0.167	6.77	7.84	544.90	13.16	4.45	515	185	523	193	5	0.37	0.45	0.53	1.39	0.11	-0.024	6.77	8.19	521.60	13.54	4.00	519	168	523	178	2309
142	1	0		Suspect		0.3	0.210	0.48	0.43	0.53	1.61	0.30	0.157	6.43	7.49	536.00	13.09	3.60	115	188	107	201	4	0.51	0.43	0.56	1.14	0.14	-0.028	4.80	5.25	546.60	13.10	3.47	106	173	100	181	23
147	1	0	Suspect	PACS	520	0.35	0.146	0.51	0.67	0.72	1.83	0.09	0.379	6.24	6.91	577.70	13.87	4.60	63	204	65	202	11	0.32	0.43	0.59	1.52	0.24	-0.009	6.37	7.07	529.80	13.59	4.17	71	174	71	181	2351
150	0	0	POAG	POAG	498	0.8	0.113	0.51	0.51	0.51	1.57	0.28	0.194	6.91	7.25	517.00	13.45	3.89	526	216	531	222	14	0.48	0.48	0.51	1.60	0.11	-0.099	7.01	7.52	530.90	13.71	3.79	524	180	530	187	2114
152	1	0	Suspect	Suspect	530	0.7	0.236	0.48	0.45	0.85	2.32	0.57	-0.007	4.83	5.49	528.40	12.76	3.62	89	163	87	165	4871	0.40	0.43	0.51	1.58	0.03	-0.041	6.29	7.09	554.20	12.76	2.64	113	178	110	187	53
153	1	0	Suspect	Suspect		0.7	0.262	0.59	0.64	0.72	1.90	0.14	0.091	5.81	6.61	592.20	12.69	2.93	91	185	90	188	4	0.59	0.59	0.64	1.88	0.19	-0.008	6.48	7.15	643.70	12.90	3.28	101	165	102	169	1583
154	1	0	Suspect	Suspect	506	0.3	0.164	0.40	0.37	0.48	1.33	0.43	-0.008	6.85	7.31	520.40	13.32	3.07	96	155	83	168	17	0.43	0.32	0.45	0.63	0.05	-0.039	5.12	5.41	524.50	13.42	3.15	87	185	82	191	23
156	1	0	Suspect	PACS	518	0.6	0.155	0.40	0.43	0.51	1.45	0.20	0.280	6.37	7.41	521.80	13.04	3.20	101	161	97	167	4	0.59	0.48	0.67	1.71	0.25	0.059	6.08	6.61	533.50	12.92	3.04	83	172	79	179	767
158	1	0		POAG	529	0.8	0.122	0.56	0.37	0.56	1.93	0.78	0.179	6.83	8.16	573.90	13.33	2.28	105	166	98	178	0	0.48	0.40	0.61	1.78	0.25	-0.030	6.00	6.64	561.70	13.40	3.39	79	175	74	185	1391
167	1	0	Suspect	PACS	494	0.3	0.123	0.35	0.35	0.45	1.04	0.11	0.309	6.16	8.43	438.80	12.78	3.68	100	176	102	179	53	0.35	0.43	0.43	0.63	0.17	0.027	4.91	5.44	493.80	13.32	3.97	88	170	85	176	20
168	1	0	Suspect	Suspect	537	0.4	0.200	0.45	0.59	0.61	1.41	0.25	0.076	6.61	7.44	534.70	13.80	4.99	102	184	96	188	6	0.35	0.48	0.53	1.48	0.14	-0.021	6.59	7.07	542.50	13.53	3.95	77	166	77	169	1049
171	0	0	Suspect	Suspect	539	0.3	0.231	0.45	0.43	0.56	2.26	0.68	-0.005	4.83	5.15	549.80	13.47	3.65	518	165	525	175	1943	0.43	0.37	0.53	1.46	0.17	-0.016	7.44	8.27	545.70	13.62	3.55	504	160	509	169	87
172	0	0	Suspect	PACS	585	0.3	0.073	0.64	0.40	0.69	1.69	0.47	0.223	6.59	7.39	589.70	13.59	3.49	522	183	535	203	6	0.61	0.35	0.67	1.70	0.27	0.008	8.32	9.12	578.10	13.86	2.77	527	160	540	181	728
174	0	0	Suspect	PACS	574	0.4	0.171	0.45	0.56	0.67	1.72	0.05	0.296	6.27	7.28	576.20	13.17	3.87	531	207	531	211	5	0.64	0.56	0.67	1.07	0.26	0.078	5.44	6.29	576.50	13.58	3.28	532	177	534	182	7
179	1	0		NTG	526	0.85	0.324	0.40	0.43	0.48	1.56	0.13	0.041	6.91	7.41	557.80	13.95	3.33	87	189	84	197	14	0.40	0.40	0.48	1.55	0.01	-0.052	6.27	6.32	536.80	14.22	5.12	60	197	58	202	1133
198	0	0		PACS		0.6	0.109	0.48	0.53	0.88	1.58	0.38	0.305	7.44	8.64	607.60	13.55	5.53	506	195	509	205	3737	0.96	0.69	1.63	1.71	0.10	0.443	6.96	8.29	569.70	14.04	7.75	497	170	491	169	1343
201	1	?		Suspect	554	0.6	0.000	0.43	0.59	1.68	1.42	0.04	0.218	5.36	9.33	692.40	13.60	5.75	101	165	114	158	10799	0.45	0.40	2.08	1.28	0.07	0.103	5.55	8.32	649.80	13.74	6.53	79	178	81	181	12257
206	1	0		Suspect	636	0.6	0.121	0.64	0.61	0.83	1.92	0.08	0.158	6.16	7.25	638.50	13.21	4.29	48	188	43	196	14	0.64	0.61	0.72	1.68	0.05	0.021	6.56	7.71	631.80	12.89	4.37	90	178	87	187	1301
212	1	0	Suspect	PACS	593		0.743	0.37	0.48	0.51	1.60	0.17	0.213	6.77	7.55	598.30	13.37	3.04	105	169	92	189	5	0.21	0.51	0.59	1.73	0.11	0.017	6.13	6.51	608.40	13.50	2.83	105	172	95	189	1295
219	0	0		POAG	502	0.4	0.568	0.40	0.37	0.48	1.52	0.25	0.117	6.85	7.65	501.40	14.00	4.03	497	171	510	190	5	0.11	0.37	0.51	1.47	0.11	0.000	7.44	8.03	530.30	13.83	3.76	540	147	553	170	3170
220	0	0		PACS	555	0.3	0.174	0.59	0.37	0.59	1.51	0.39	0.259	7.17	8.16	547.30	14.15	5.41	528	151	540	169	7	0.37	0.40	0.64	1.55	0.14	0.011	8.51	9.33	539.70	14.53	4.51	537	131	539	136	929
220	1	0		PACS	563	0.3	0.115	0.40	0.43	0.59	1.28	0.30	0.172	7.25	7.81	559.80	14.30	5.71	81	201	72	210	20	0.32	0.35	0.56	1.26	0.08	0.003	6.99	7.63	552.80	14.28	4.93	79	162	67	175	3215
226	0	0	Suspect	Suspect	622	0.4	0.301	0.37	0.29	0.53	1.45	0.33	0.104	6.91	7.68	616.70	14.05	3.81	544	171	557	191	17	0.37	0.32	0.53	0.22	0.17	0.013	6.05	6.85	625.10	14.13	3.76	517	178	530	198	23
228	0	0		PACS	634	0.4	0.133	0.45	0.43	0.45	1.38	0.33	0.273	6.37	7.68	644.60	12.42	3.04	522	161	531	170	20	0.40	0.40	0.59	1.52	0.17	-0.039	6.96	8.03	652.00	12.26	2.80	515	164	522	170	512
228	1	0	Suspect	Suspect	625	0.4	0.220	0.29	0.40	0.48	1.33	0.45	0.249	6.05	7.39	609.80	12.02	3.55	73	186	74	195	14	0.32	0.45	0.48	0.90	0.24	0.006	4.77	5.36	612.80	12.61	3.17	78	183	74	191	71
229	0	0	PACG/MMG	MMG	498	0.5	0.299	0.32	0.45	0.48	1.58	0.39	0.239	7.63	8.32	493.50	14.76	3.73	511	198	524	214	20	0.40	0.40	0.48	0.56	0.08	0.037	6.45	7.15	476.20	14.94	3.17	542	170	555	187	26
231	0	0		POAG		0.7	0.319	0.51	0.40	0.53	1.38	0.18	0.131	6.80	7.92	570.70	12.95	4.11	504	159	505	164	5	0.45	0.29	0.48	1.42	0.19	-0.045	7.36	8.64	569.20	13.05	3.71	497	165	503	172	455
236	0	0		POAG	564	0.5	0.169	0.59	0.48	0.69	2.40	0.35	0.251	7.07	7.92	554.60	14.01	3.88	510	173	512	182	5	0.48	0.43	0.64	2.28	0.23	0.010	7.01	7.55	587.90	14.26	2.64	505	188	505	191	1049
245	0	0	PACS	PACS	494	0.45	0.129	0.43	0.59	0.59	1.63	0.43	0.208	6.80	7.79	497.30	12.70	4.00	491	203	504	217	5	0.48	0.51	0.59	1.62	0.27	-0.003	7.71	9.09	509.20	13.15	3.55	511	146	521	160	563
